# Supplementary material for: A Fucosylated Lactose-Presenting Tetravalent Glycocluster Acting as a Mutual Ligand of Pseudomonas aeruginosa Lectins A (PA-IL) and B (PA-IIL)—Synthesis and Interaction Studies
Source: Int J Mol Sci. 2022 Dec 19;23(24):16194. doi: 10.3390/ijms232416194 (PMC9782601; doi:10.3390/ijms232416194)
Supplement: Supplementary file 1 [file ijms-23-16194-s001.zip › ijms-2022668-supplementary.pdf]

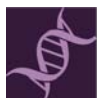

SUPPLEMENTARY MATERIAL

# A fucosylated lactose-presenting tetravalent glycocluster acting as a mutual ligand of *Pseudomonas aeruginosa* lectin A (PA-IL) and B (PA-IIL)- Synthesis and interaction studies

Magdolna Csávás<sup>1</sup>, László Kalmár<sup>2</sup>, Petronella Szőke<sup>3</sup>, László Bence Farkas<sup>1,4</sup>, Bálint Bécsi<sup>5</sup>, Zoltán Kónya<sup>5</sup>, János Kerégyártó<sup>6</sup>, Anikó Borbás<sup>3</sup>, Ferenc Erdődi<sup>5</sup>, Katalin E. Kövér<sup>1,4,\*</sup>

- <sup>1</sup> Research Group for Molecular Recognition and Interaction, Loránd Eötvös Research Network, University of Debrecen, Egyetem tér 1, H-4032 Debrecen, Hungary  
<sup>2</sup> Department of Ecology, University of Debrecen, Egyetem tér 1, H-4032 Debrecen, Hungary  
<sup>3</sup> Department of Pharmaceutical Chemistry, University of Debrecen, Egyetem tér 1, H-4032, Debrecen, Hungary  
<sup>4</sup> Department of Inorganic and Analytical Chemistry, University of Debrecen, Egyetem tér 1, H-4032 Debrecen, Hungary  
<sup>5</sup> Department of Medical Chemistry, University of Debrecen, Egyetem tér 1, H-4032 Debrecen, Hungary  
<sup>6</sup> Department of Botany, University of Debrecen, Egyetem tér 1, H-4032 Debrecen, Hungary  
\* Correspondence: kover@science.unideb.hu; +3652-512900

Received: ; Accepted: ; Published:

## SUPPLEMENTARY MATERIAL

**Figures S1-S2.** <sup>1</sup>H and STD NMR spectra of ligands **6** and **8** in the presence of PA-IIL.

**Table S1.** Intensity change of the methyl STD signal of the reference compound upon titration with the tetravalent ligand **8**.

**Figures S3-S10.** 1D and 2D NMR spectra of compounds **6** and **8**.

## References

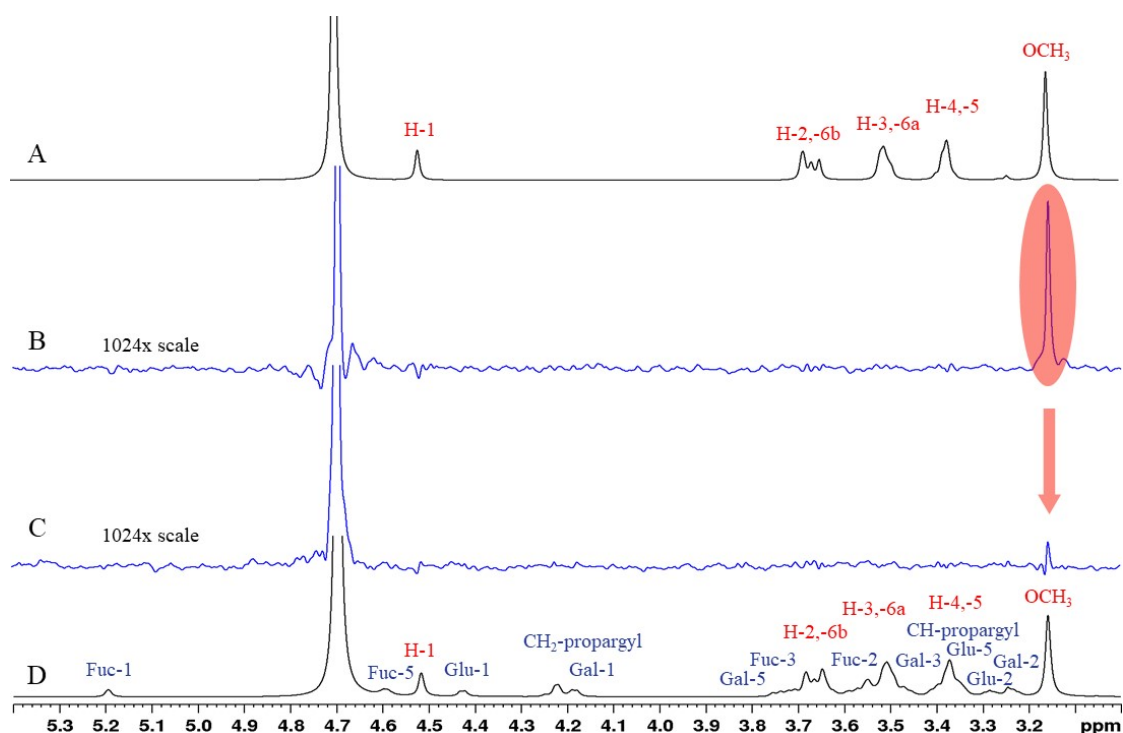

**Figure S1.** (A)  $^1\text{H}$  and (B) STD NMR spectra of 4 mM Me $\alpha$ -D-Man in the presence of 40  $\mu$ M PA-IL monomer in D<sub>2</sub>O (700 MHz, 20 mM Tris-d<sub>11</sub>, 150 mM NaCl, 5 mM CaCl<sub>2</sub>, pH = 7.5, T = 283 K). (C) STD and (D)  $^1\text{H}$  spectra of 40  $\mu$ M PA-IL and 4 mM Me $\alpha$ -D-Man titrated propargyl glycoside of 3-O-fucosyl lactose (Compound 6). The proton signals of the reference ligand are assigned with red color, while those of the competitor are indicated in blue.

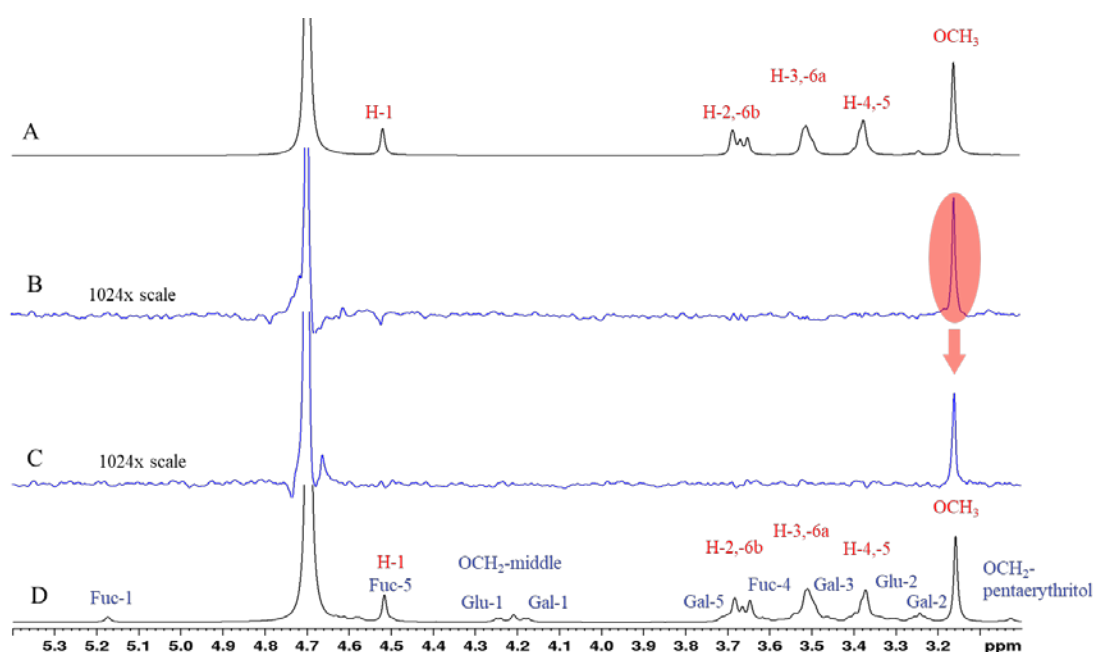

**Figure S2.** (A)  $^1\text{H}$ - and (B) STD NMR spectra of 4 mM Me $\alpha$ -D-Man in the presence of 40  $\mu\text{M}$  PA-III monomer in  $\text{D}_2\text{O}$  (700 MHz, 20 mM Tris- $\text{d}_{11}$ , 150 mM NaCl, 5 mM  $\text{CaCl}_2$ , pH = 7.5, T = 283 K). (C) STD and (D)  $^1\text{H}$ -NMR spectra of 40  $\mu\text{M}$  PA-III and 4 mM Me $\alpha$ -D-Man titrated with 0.4 mM tetravalent 3-fucosyl lactose derivative (Compound 8). The proton signals of the reference ligand are assigned with red color, while those of the competitor are indicated in blue.

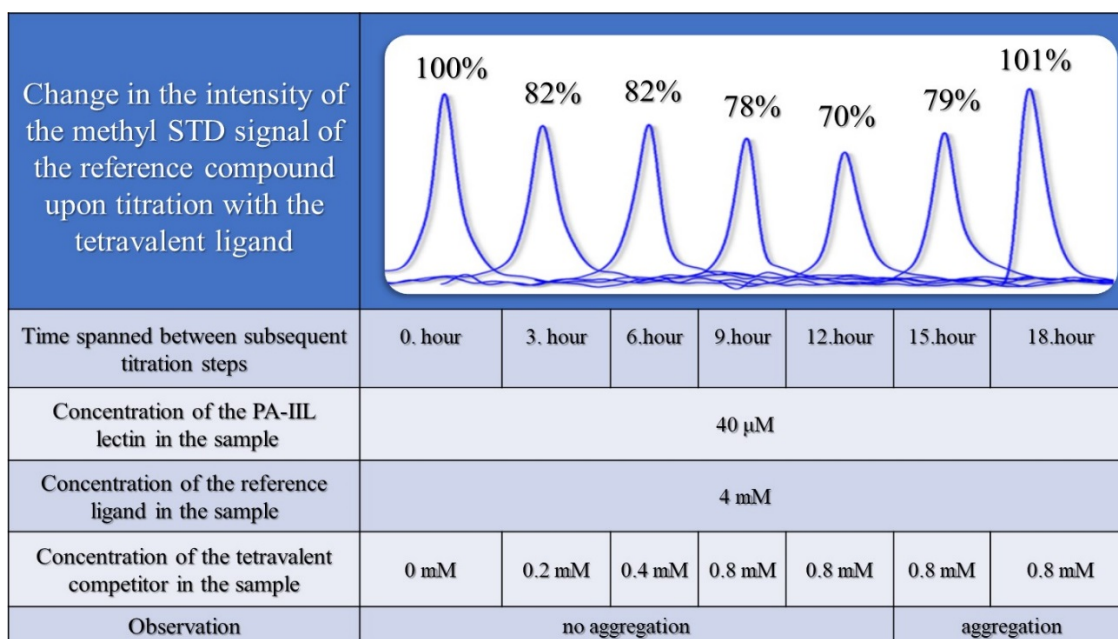

**Table S1.** Intensity change of the methyl STD signal of the reference compound upon titration with the tetravalent ligand 8.

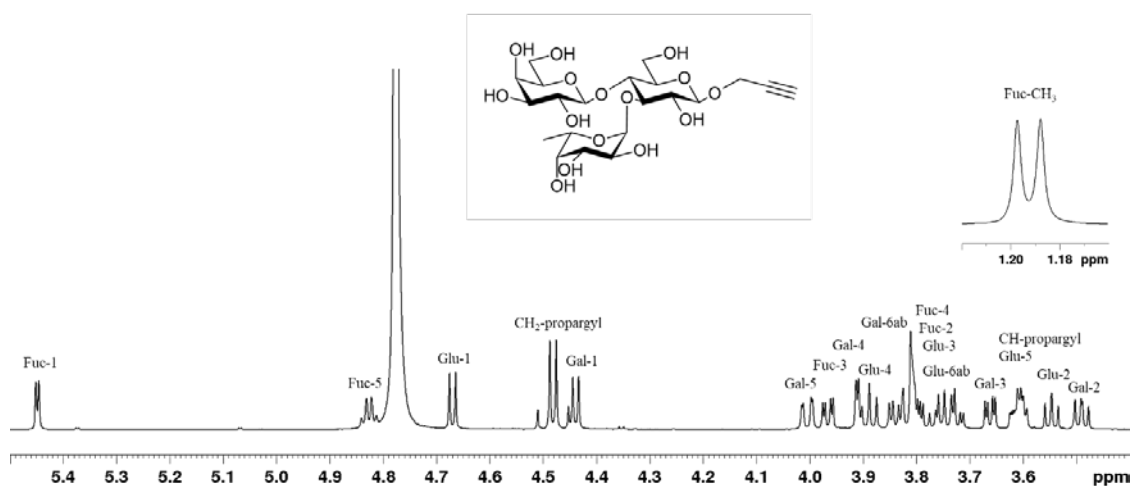

**Figure S3.** Structure and  $^1\text{H}$ -NMR spectrum of 5 mM propargyl glycoside of 3-fucosyl lactose (Compound 6) in  $\text{D}_2\text{O}$  (700 MHz, 20 mM Tris- $\text{d}_{11}$ , 150 mM NaCl, 5 mM  $\text{CaCl}_2$ , pH = 7.5, T = 298 K).

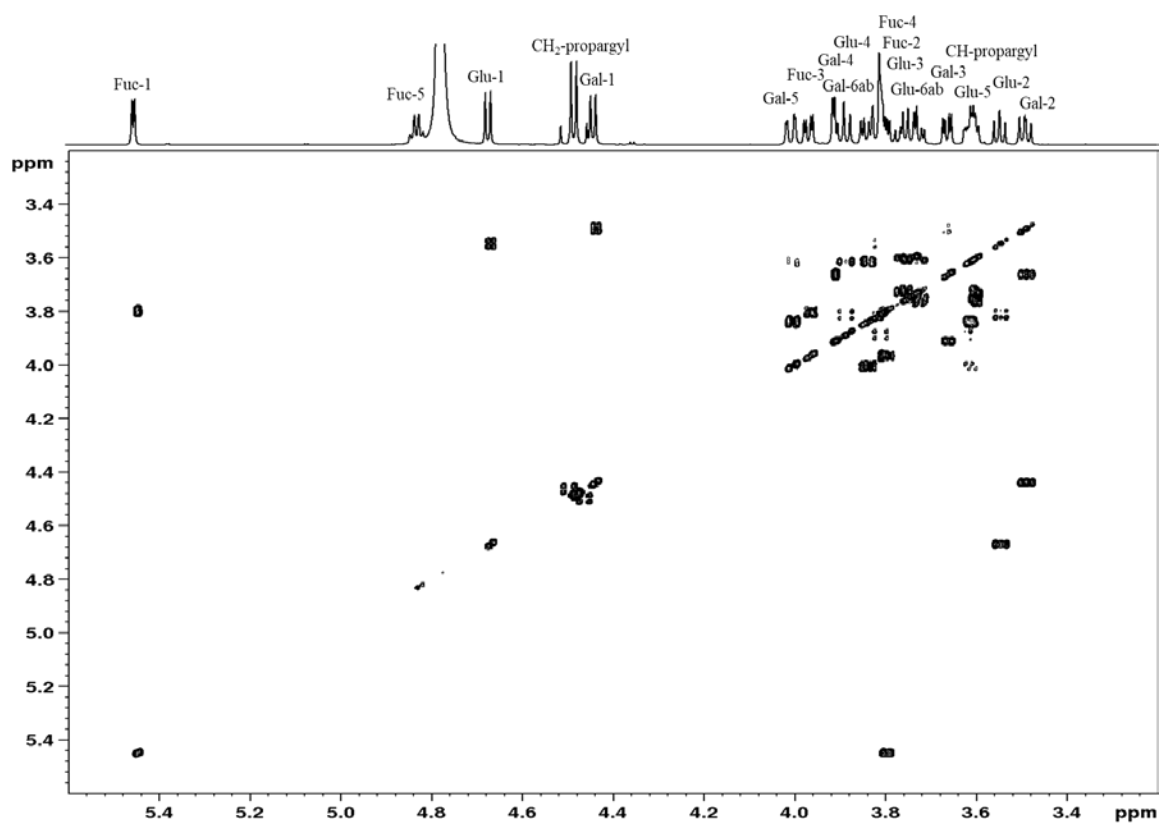

**Figure S4.** 2D COSY spectrum of 5 mM propargyl glycoside of 3-fucosyl lactose (Compound 6) in  $\text{D}_2\text{O}$  (700 MHz, 20 mM Tris- $\text{d}_{11}$ , 150 mM NaCl, 5 mM  $\text{CaCl}_2$ , pH = 7.5, T = 298 K).

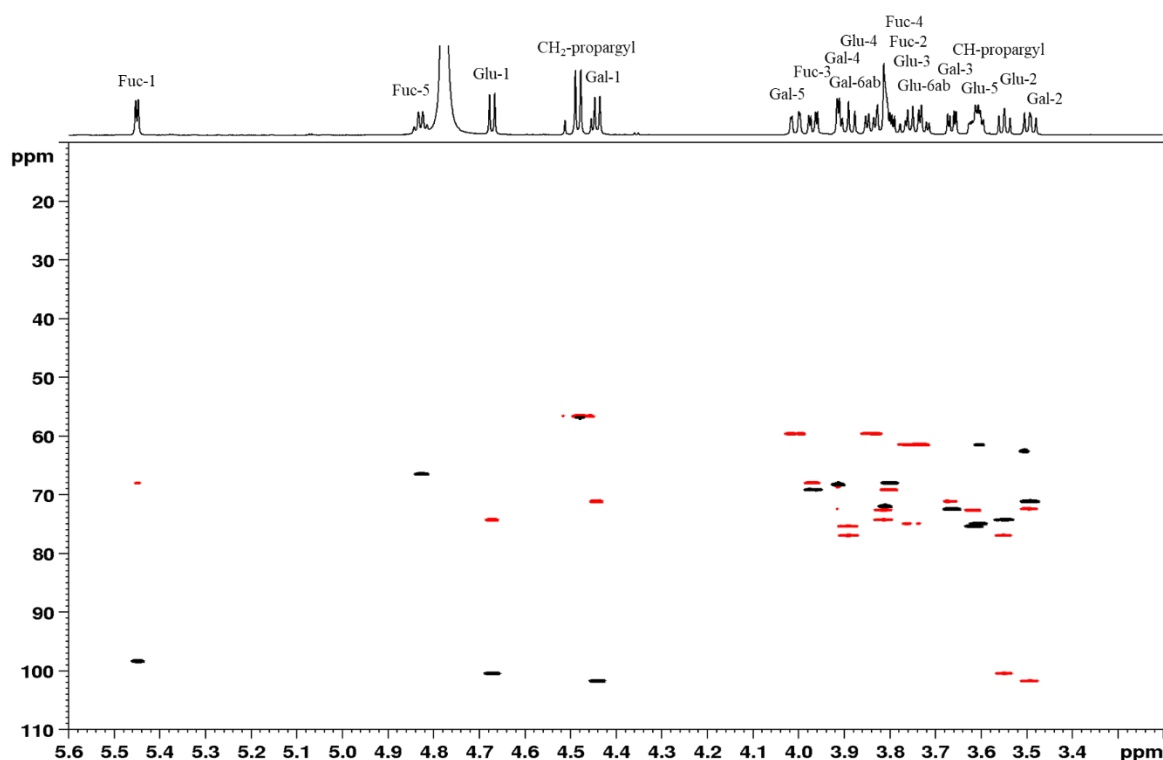

**Figure S5.** 2D HSQC-CLIP-COSY [1, 2] spectrum of 5 mM propargyl glycoside of 3-fucosyl lactose (Compound 6) in D<sub>2</sub>O (700 MHz, 20 mM Tris-d<sub>11</sub>, 150 mM NaCl, 5 mM CaCl<sub>2</sub>, pH = 7.5, T = 298 K). The HSQC peaks are shown in black, while the COSY-type peaks are red.

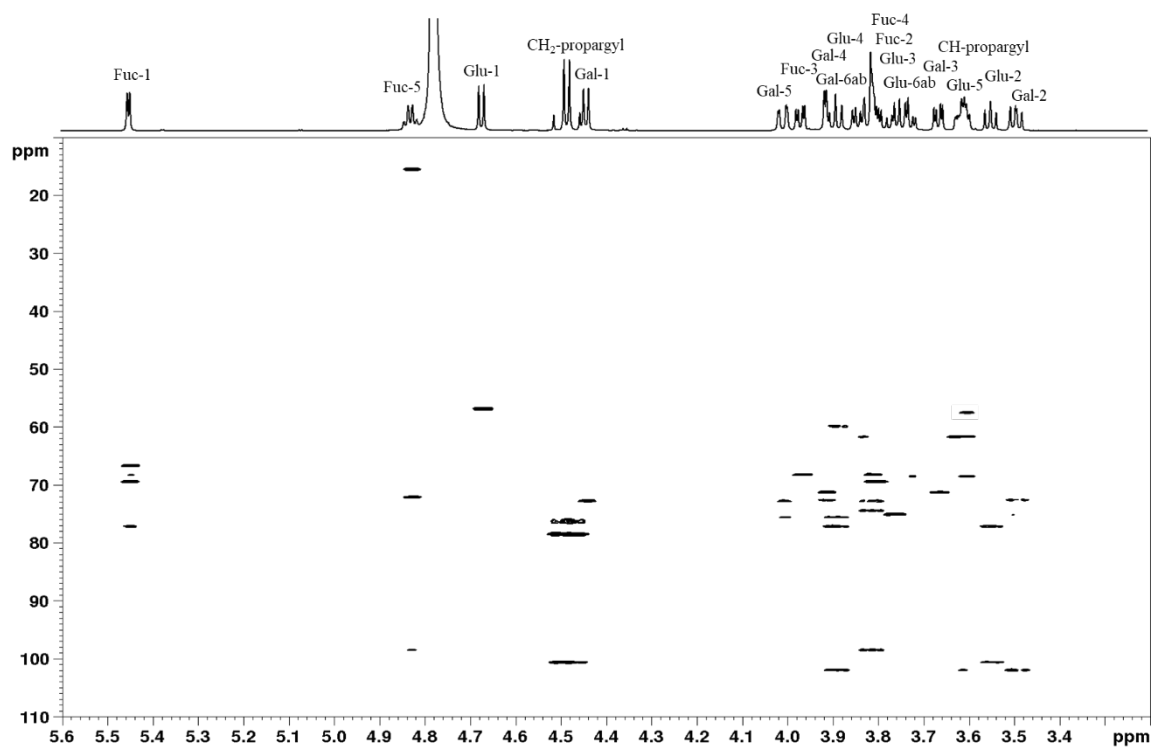

**Figure S6.** 2D <sup>1</sup>H-<sup>13</sup>C HMBC spectrum of 5 mM propargyl glycoside of 3-fucosyl lactose (Compound 6) in D<sub>2</sub>O (700 MHz, 20 mM Tris-d<sub>11</sub>, 150 mM NaCl, 5 mM CaCl<sub>2</sub>, pH = 7.5, T = 298 K).

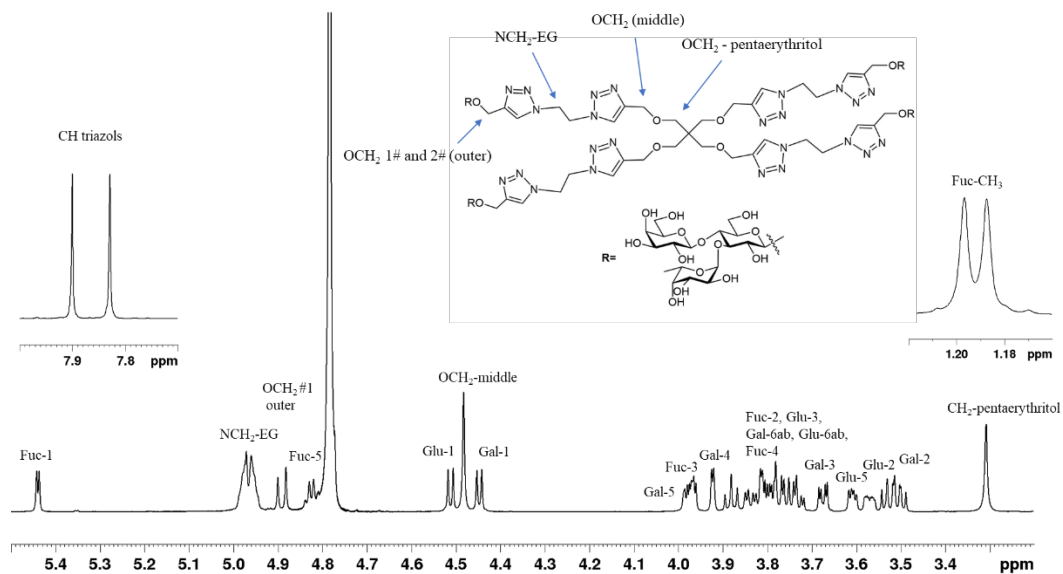

**Figure S7.** Structure and <sup>1</sup>H-NMR spectrum of 1 mM tetravalent 3-fucosyl lactose derivative (Compound 8) in D<sub>2</sub>O (700 MHz, 20 mM Tris-d<sub>11</sub>, 150 mM NaCl, 5 mM CaCl<sub>2</sub>, pH = 7.5, T = 298 K).

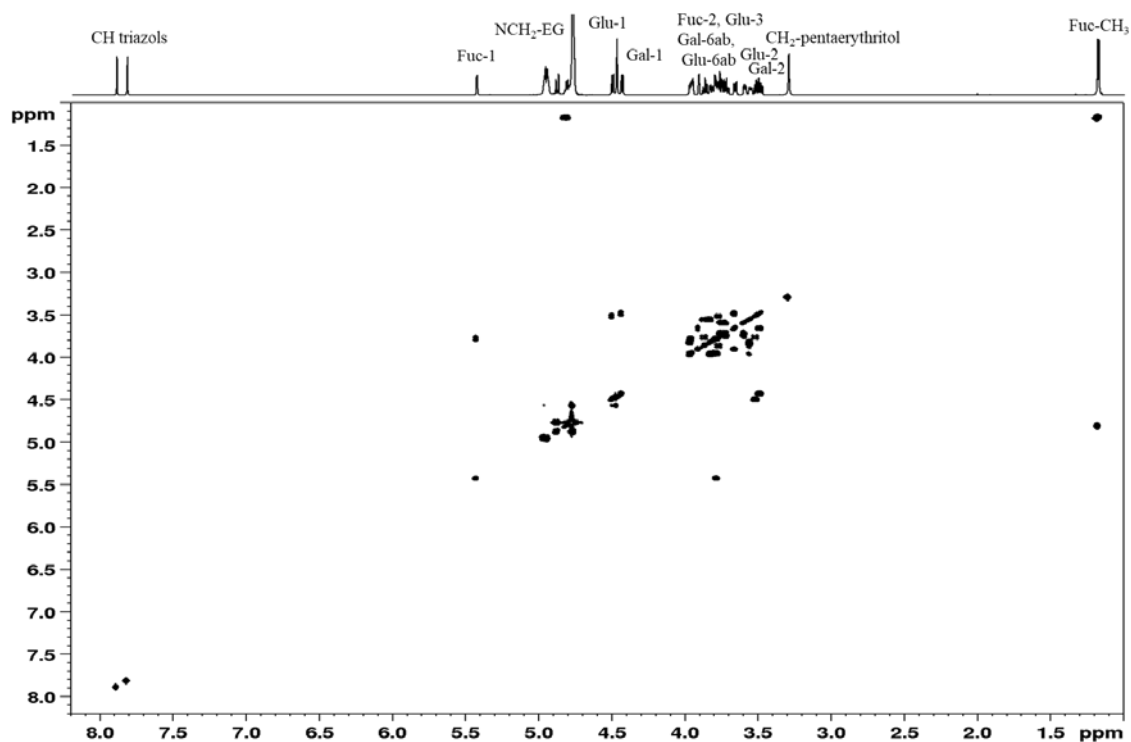

**Figure S8.** 2D COSY spectrum of 1 mM tetravalent 3-fucosyl lactose derivative (Compound 8) in D<sub>2</sub>O (700 MHz, 20 mM Tris-d<sub>11</sub>, 150 mM NaCl, 5 mM CaCl<sub>2</sub>, pH = 7.5, T = 298 K).

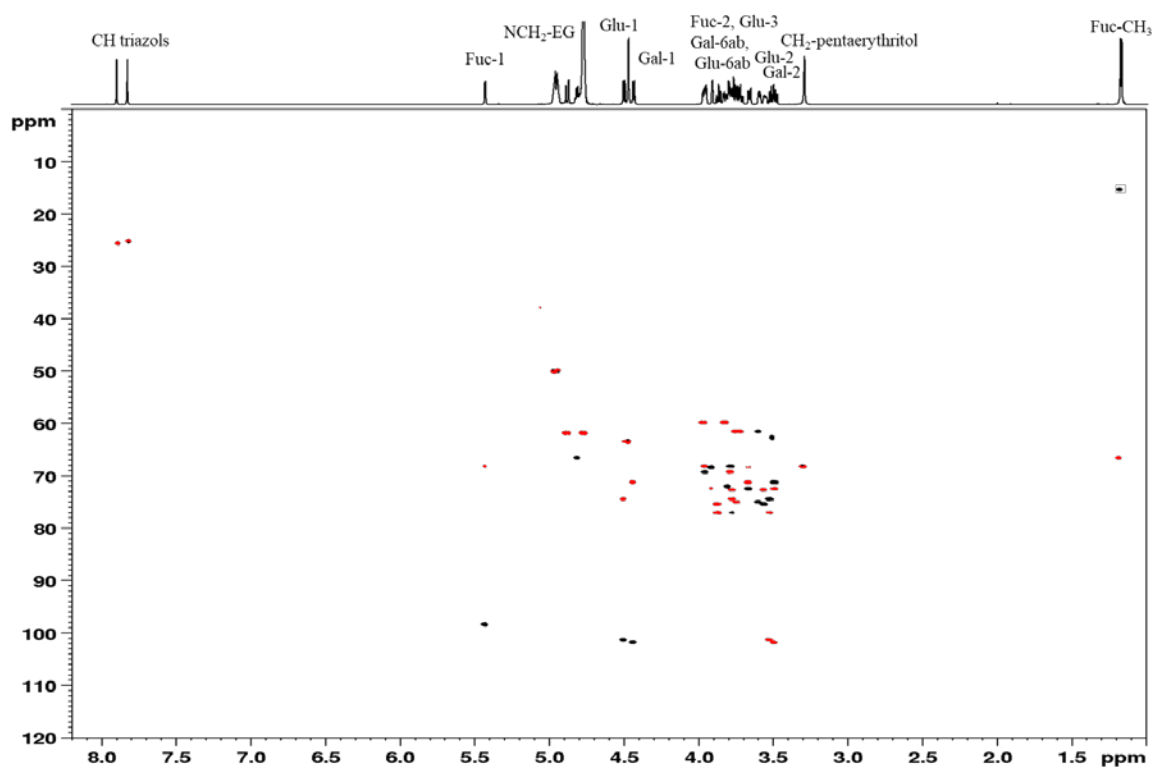

**Figure S9.** 2D HSQC-CLIP-COSY spectrum of 1 mM tetravalent 3-fucosyl lactose derivative (Compound 8) in D<sub>2</sub>O (700 MHz, 20 mM Tris-d<sub>11</sub>, 150 mM NaCl, 5 mM CaCl<sub>2</sub>, pH = 7.5, T = 298 K). The HSQC peaks are shown in black, while the COSY-type peaks are red.

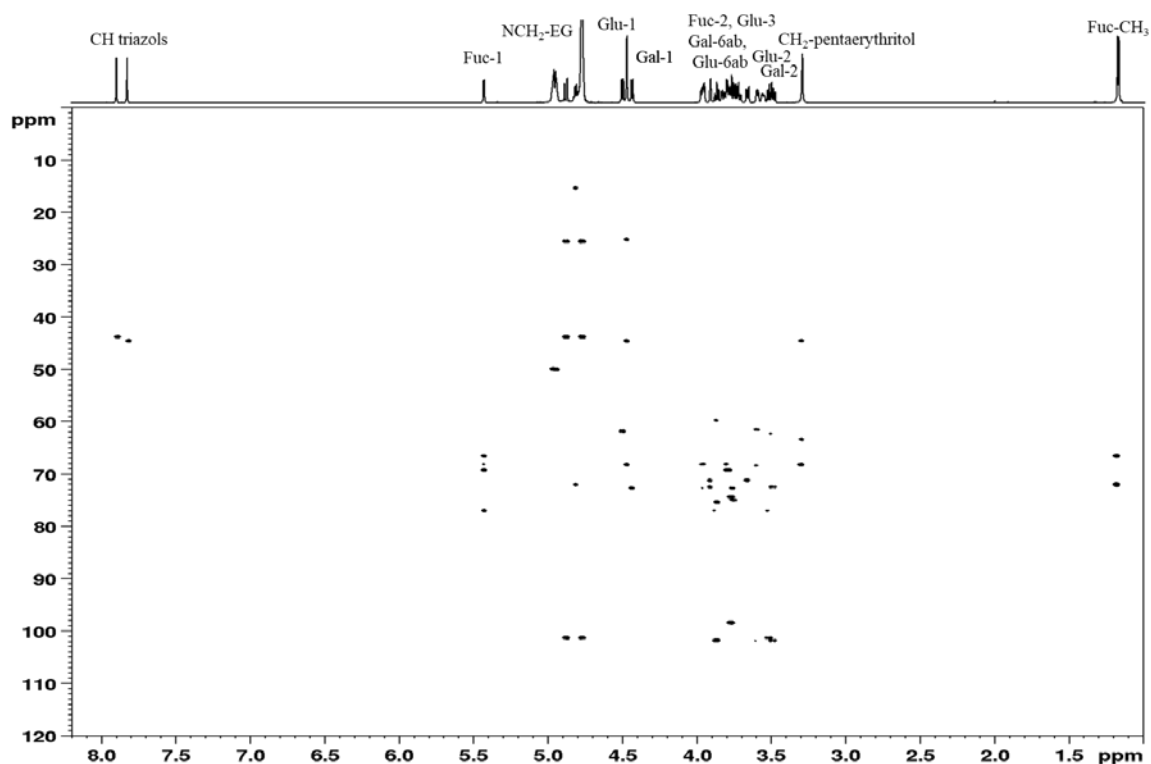

**Figure S10.** 2D <sup>1</sup>H-<sup>13</sup>C HMBC NMR spectrum of 1 mM tetravalent 3-fucosyl lactose derivative (Compound 8) in D<sub>2</sub>O (700 MHz, 20 mM Tris-d<sub>11</sub>, 150 mM NaCl, 5 mM CaCl<sub>2</sub>, pH = 7.5, T = 298 K).

## References

1. Gyöngyösi, T., Timári, I., Sinnaeve, D., Luy B., Kövér, E. K. Expedited Nuclear Magnetic Resonance Assignment of Small- to Medium-Sized Molecules with Improved HSQC-CLIP-COSY Experiments. *Anal. Chem.*, **2021**, 93, 3096-3102. doi: 10.1021/acs.analchem.0c04124.
2. Gyöngyösi, T., Timári, I., Haller, J., Koos, M. R. M., Luy, B., Kövér, K. E. Boosting the NMR Assignment of Carbohydrates with Clean In-Phase Correlation Experiments. *ChemPlusChem*, **2018**, 83, 53-60. doi: 10.1002/cplu.201700452
